# Supplementary material
Source: PubMed Central journal article supplement (PMC2847054)

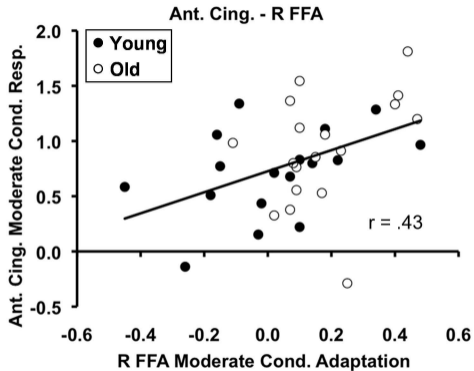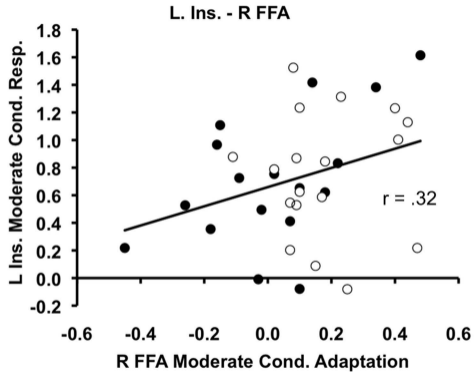

Supplement: NIHMS178433-supplement-01.pdf [file NIHMS178433-supplement-01.pdf]
